# Supplementary material for: SERS-based rapid assay for sensitive detection of Group AStreptococcusby evaluation of the swab sampling technique
Source: Royal Society of Chemistry journal article supplement (doi:10.1039/c9an00173e), 2019-01-01
Supplement: c9an00173e1.pdf [file c9an00173e1.pdf]

1 Supporting Information for:

2 **SERS-based Rapid Assay for Sensitive Detection of Group A *Streptococcus* by Evaluation**  
3 **of the Swab Sampling Technique**

4 Merve Eryılmaz<sup>a</sup>, Esra Acar Soykut<sup>b</sup>, Demet Çetin<sup>c</sup>, İsmail Hakkı Boyacı<sup>d</sup>, Zekiye Suludere<sup>e</sup>,  
5 Uğur Tamer<sup>a,\*</sup>

6 <sup>a</sup>Department of Analytical Chemistry, Gazi University, Faculty of Pharmacy, 06330, Ankara,  
7 Turkey.

8 <sup>b</sup>Division of Food Quality Control and Analysis, Yeniçağa Yaşar Çelik Vocational School, Abant  
9 İzzet Baysal University, 14650, Bolu, Turkey.

10 <sup>c</sup>Department of Mathematics and Science Education, Gazi Faculty of Education, Gazi University,  
11 06500 Ankara, Turkey.

12 <sup>d</sup>Department of Food Engineering, Faculty of Engineering, Hacettepe University, 06800, Ankara,  
13 Turkey.

14 <sup>e</sup>Department of Biology, Faculty of Science, Gazi University, 06500, Ankara, Turkey.

15

16 **Corresponding Author:**

17 \*E-mail: utamer@gazi.edu.tr

18

19

20

21

22

23

24

## 25 **Procedure for synthesis of magnetic gold nanoparticles**

26 These nanoparticles had a spherical core-shell structure which occurred with hydroxylamine  
27 reduction of  $\text{HAuCl}_4$  on the surface of EDTA immobilized iron (magnetite  $\text{Fe}_3\text{O}_4$ ) nanoparticles  
28 in the presence of CTAB solution. As it was previously described in the literature (Tamer et. al.,  
29 2010), magnetite nanoparticles were synthesized at first with a slight change. For this purpose,  
30 0.64 M  $\text{FeSO}_4 \cdot 7\text{H}_2\text{O}$  and 1.28 M  $\text{FeCl}_3$  were dissolved in deionized water for the precipitation of  
31 Fe (III) and Fe (II). After, 1M NaOH was added dropwise for 40 min and black precipitation was  
32 collected with a magnet and washed with deionized water. For obtaining oxidized  $\text{Fe}_3\text{O}_4$   
33 nanoparticles, the resulting solution was washed with 2M  $\text{HClO}_4$  and left in the same solution for  
34 3 hours. Then, the  $\text{Fe}_3\text{O}_4$  were centrifuged at 10,000 rpm for 20 min and washed with deionized  
35 water for three times. For the deposition of the gold layer, 10 mg of pre-prepared  $\text{Fe}_3\text{O}_4$   
36 nanoparticles were dispersed in EDTA solution and after a 10 min of centrifugation at 8000 rpm,  
37 7 mL of 0.1 M CTAB, 3 mL of 0.1 M  $\text{HAuCl}_4$  and 150 mg of hydroxylamine added in turn by  
38 mixing in a sonicator. In the end, reduction of Au(III) into Au(0) enabled the formation of the gold  
39 layer onto the  $\text{Fe}_3\text{O}_4$  surface. The final solution was left in the shaker for 24 hours and when the  
40 color was dark red, they were ready to use in assays.

41

42

43

44

45

46

47

48

49

50

51

**52 Procedure for synthesis of spherical gold nanoparticles**

53 First of all, 50 mL of distilled water was boiled in an oil bath and 20  $\mu\text{L}$  of 30%  $\text{HAuCl}_4$  was added  
54 under vigorous stirring. Then, 5 mL of 40 mM sodium citrate solution was added and the solution  
55 kept boiling for 20 minutes. In the end, the color of the solution changed to wine red as the  
56 confirmation of the spherical AuNPs. The solution was cooled at room temperature and kept in the  
57 fridge for further modification.

58

**59 Procedure for synthesis of rod shaped gold nanoparticles**

60 For this purpose, a two-step protocol, seed-mediated growth technique was followed to synthesize  
61 rod-shaped gold nanoparticles. First, 4.75 mL of 0.1 M CTAB solution and 500  $\mu\text{L}$  of 0.01 M  
62  $\text{HAuCl}_4$  solution were mixed to form the seed solution. The synthesis of AuNPs started with  
63 reducing Au(III) to Au(0) by adding 600  $\mu\text{L}$  of 0.01 M ice-cold  $\text{NaBH}_4$  rapidly and this solution  
64 was allowed to stand for 30 min to form the seed. Second, to prepare gold nanorods, growth  
65 solution was prepared by mixing 500  $\mu\text{L}$  of 0.01 M  $\text{HAuCl}_4$ , 4.75 mL of 0.1 M CTAB and 60  $\mu\text{L}$   
66 of 0.01 M  $\text{AgNO}_3$ . The resulting color was deep yellow and after one minute, 100  $\mu\text{L}$  of ascorbic  
67 acid was added and the solution turned colorless. To obtain the final nanorod solution, 10  $\mu\text{L}$  of  
68 seed solution was added and after one hour, the color was turned to dark blue. Both magnetic and  
69 rod-shaped AuNPs were characterized with UV-visible spectroscopy and transmission electron  
70 microscope (TEM).

71

72

73

74

75

76

77

**78 Procedure for the modification of AuNPs**

79 For this purpose, magnetic AuNPs were mixed with 20 mM of 11-MUA for 24 hours. Then, the  
80 nanoparticles were washed by centrifugation with MES buffer pH 6.5 and then freshly prepared  
81 0.05 M of NHS and 0.1 M EDC were added and waited for 45 min to activate the carboxyl groups.  
82 After the activation, magnetic AuNPs were ready to interact with 0.1 mg/mL of streptavidin for an  
83 hour. Then, the magnetic AuNPs were washed again with MES buffer pH 6.5, and 0.1 mg/mL of  
84 polyclonal anti-Group A *Streptococcus* antibody added and waited for an hour for the  
85 modification. In the end, to block the unreacted activated esters, the magnetic AuNPs interacted  
86 with 10% of ethanolamine in PBS buffer for 30 minutes. The washing procedure was performed  
87 twice prior to a final resuspension of the AuNPs with PBS buffer and they were stored at 4°C  
88 before use. SERS tagged rod shaped Au-NPs were also modified with the same procedure.  
89 However, they were modified with 20 mM of DTNB prepared in ethanol, instead of 11-MUA for  
90 24 hours. The rest of the antibody conjugation was followed as described above.

91

**92 Modification of gold nanoparticles for SERS-based LFIA test.**

93 Spherical AuNPs modified with SERS-tag and anti-GAS antibody for using at conjugation pad.  
94 These NPs were modified with DTNB and antibody by the same method explained above. The  
95 concentration of antibody was 0.5 mg/mL in this step and % 5 BSA was preferred for blocking the  
96 inactivated groups. In the end, AuNPs were washed three times and the pellet was suspended in  
97 PBS pH 7.4 containing 0.1 M trehalose and 0.05 % Tween 20 to enable easy dissolve of modified  
98 AuNPs by the lateral flow.

99

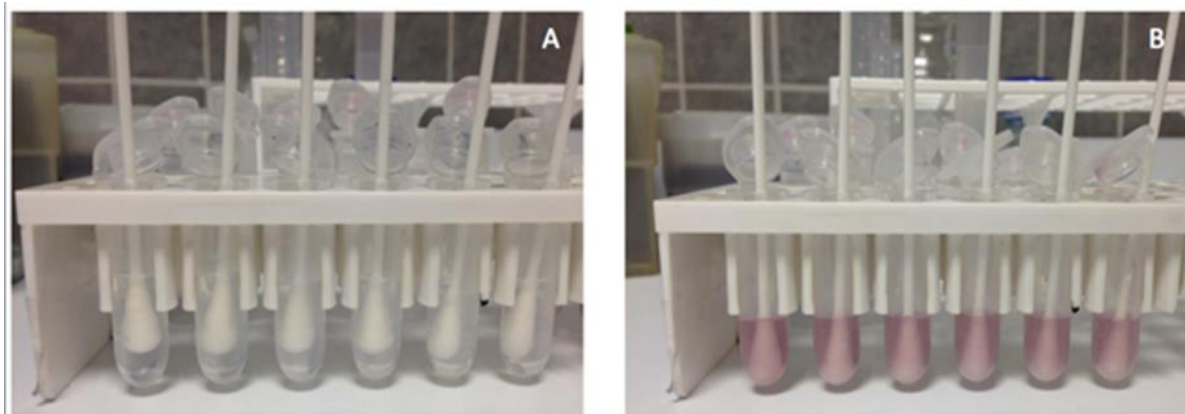

100

101 **Figure S1.** A) Cotton swabs in dilutions of different Group A *Streptococcus pyogenes* (GAS) B)  
102 Cotton swabs with GAS in the modified magnetic gold nanoparticles

103

104

105

106

107

108

109

110

111

112

113

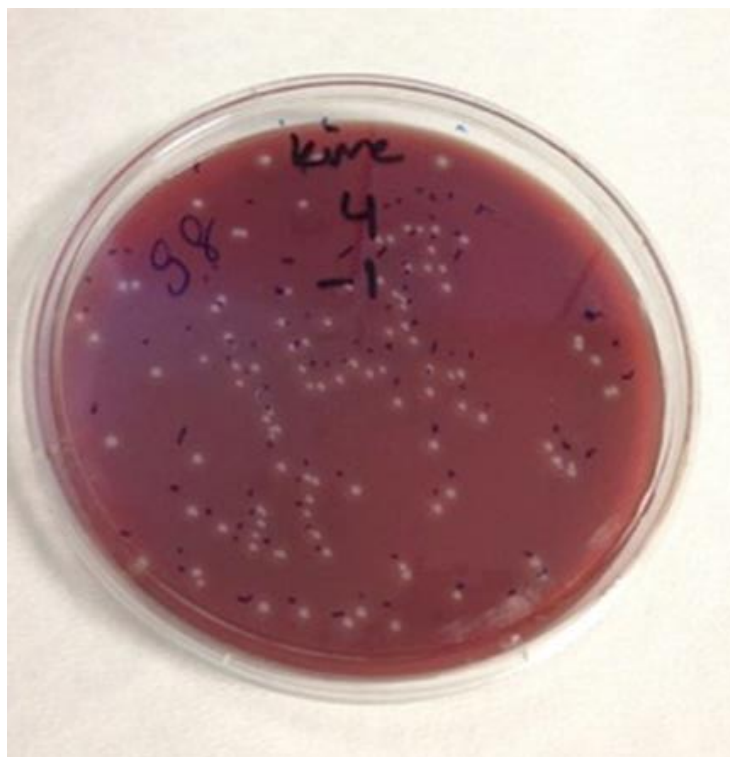

114

115 **Figure S2.** Image of a plate for counting colonies of Group A *Streptococcus pyogenes* on the  
116 Columbia agar.

117

118

119

120

121

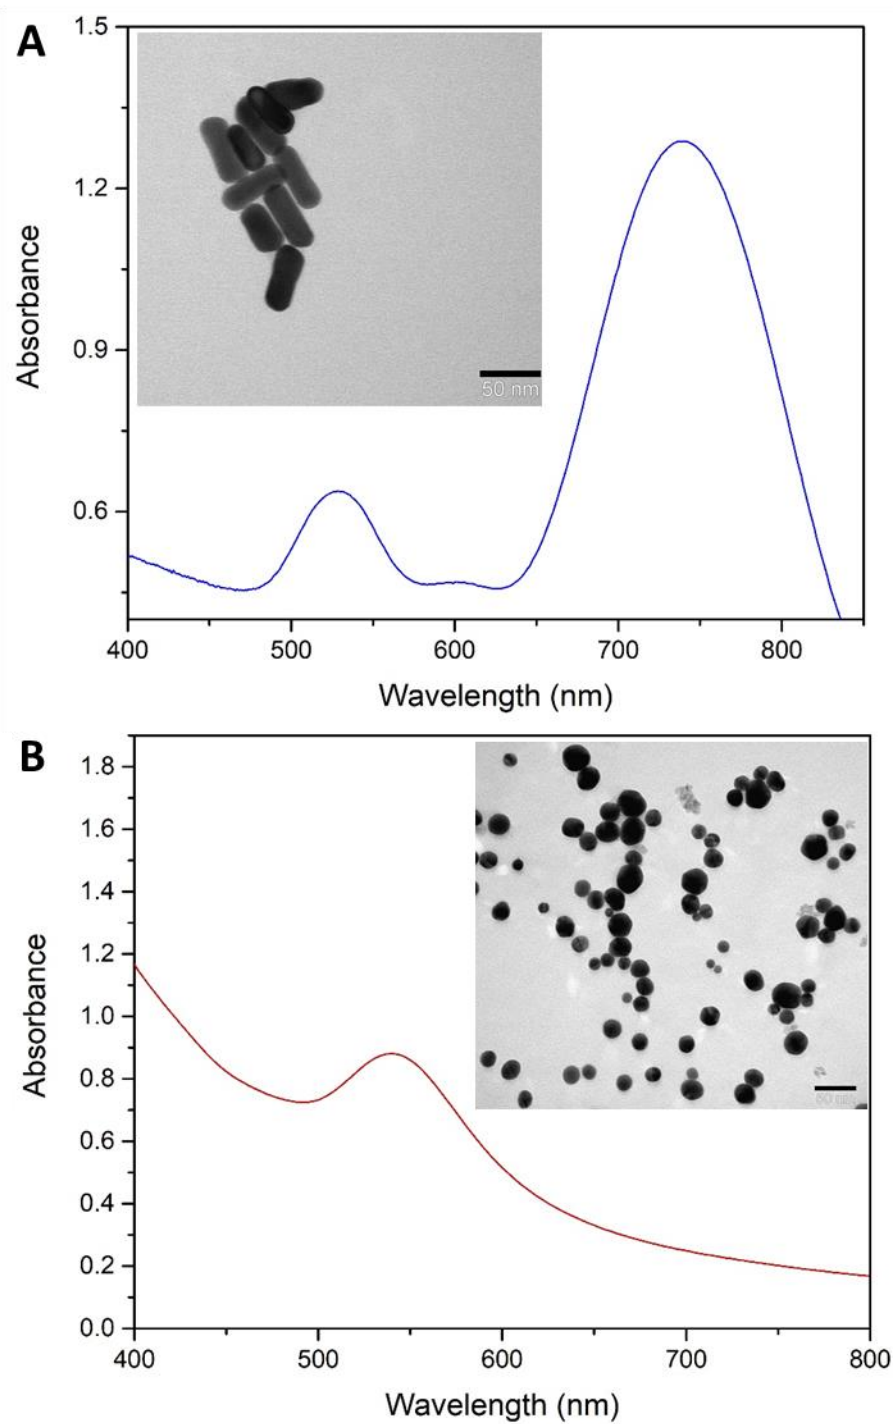

122

123 **Figure S3.** A) UV-vis spectra of rod-shaped gold nanoparticles and TEM image of the rod-shaped  
124 gold nanoparticles in a 50 nm scale (inset). B) UV-vis spectra of magnetic gold nanoparticles and  
125 TEM image of them in a 50 nm scale (inset).

126

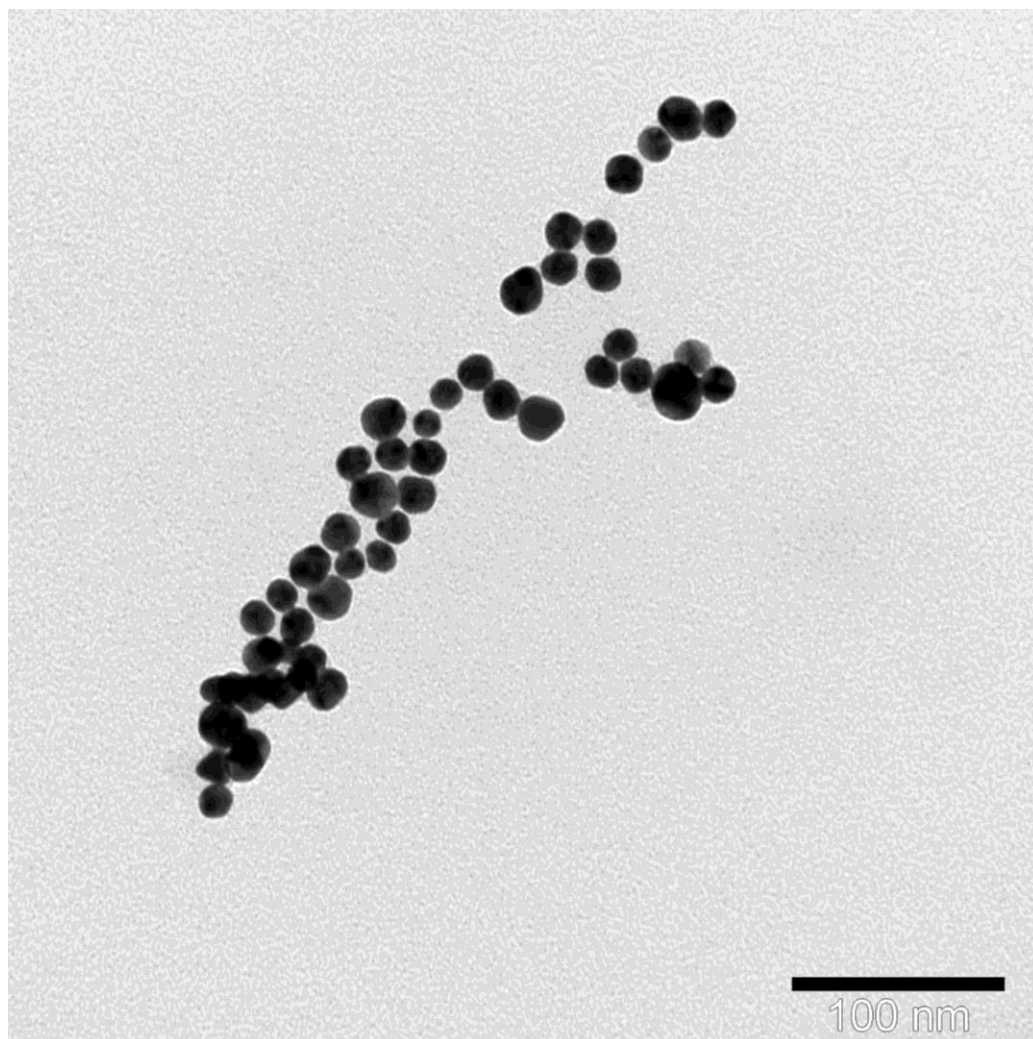

127

128 **Figure S4.** TEM image of the spherical gold nanoparticles in a 100 nm scale.

129

130

131

132

133

134

135



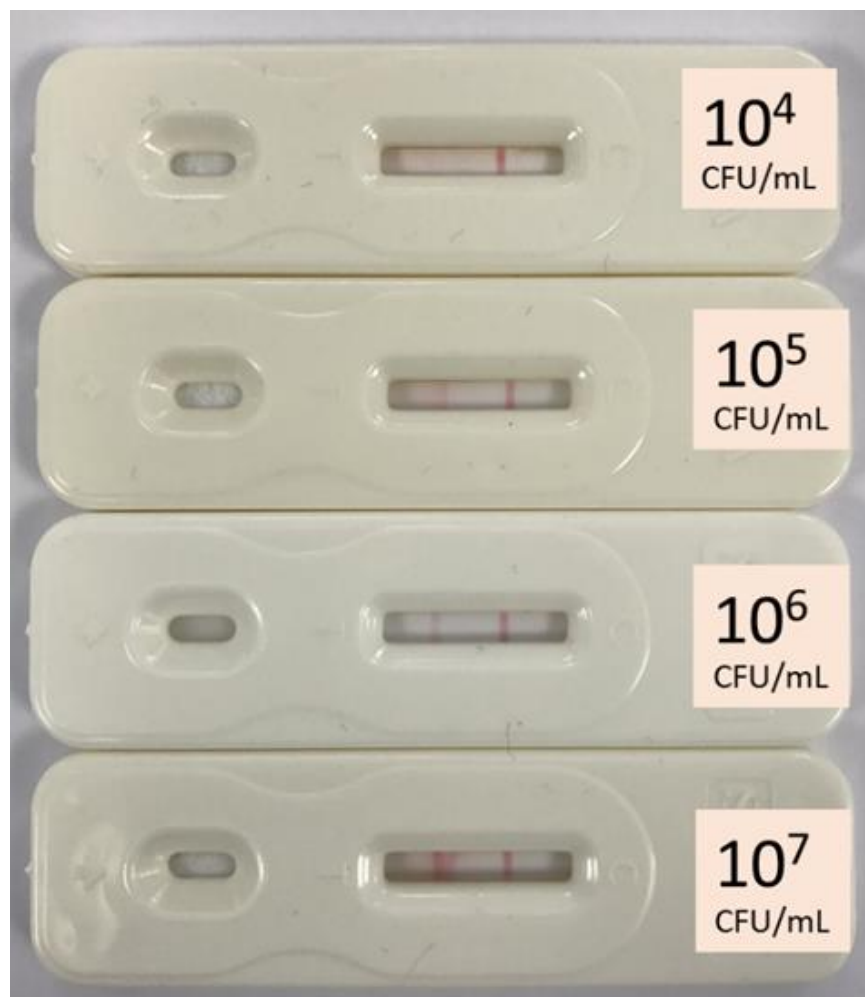

136

137 **Figure S5.** Detection of whole-cell *S. pyogenes* in the range of  $10^4$  –  $10^7$  CFU/mL with commercial  
138 test strips. Left lines for the test lines and the right lines for the control lines of LFIA.

139
